# Supplementary material for: Long-term metabolic consequences of acute dioxin exposure differ between male and female mice
Source: PubMed Central journal article supplement (PMC6989671; doi:10.1038/s41598-020-57973-0), 2020-01-29
Supplement: 41598_2020_57973_MOESM1_ESM.pdf [file 41598_2020_57973_MOESM1_ESM.pdf]

**Table S1:** Primer sequences for qPCR

| Target        | Forward Sequence (5'-3')                 | Reverse Sequence (5'-3')               | Amplicon Size (bp) | Amplification Efficiency (%) |
|---------------|------------------------------------------|----------------------------------------|--------------------|------------------------------|
| <i>PPIA</i>   | AGC TCT GAG CAC TGG AGA GA               | GCC AGG ACC TGT ATG CTT TA             | 178                | 101.6                        |
| <i>Hprt</i>   | GCT GAC CTG CTG GAT TAC AT               | TTG GGG CTG TAC TGC TTA AC             | 242                | 122.4                        |
| <i>Cyp1a1</i> | ATC ACA GAC AGC CTC ATT GAG C            | AGA TAG CAG TTG TGA CTG TGT C          | 139                | 135.0                        |
| <i>Cyp1a2</i> | CAA GAG GTT TAA GAC CTT CAA<br>TGA TAA C | AAA GAT GTC ATT GAC AAT GTT<br>GAC AAT | 193                | 105.7                        |
| <i>Tnfa</i>   | AGT CCG GGC AGG TCT ACT TT               | ATG AAC ACC CAT TCC CTT CA             | 55                 | 96.8                         |
| <i>Nf-kb</i>  | CTC AGG AGC AGA AGT CTG GG               | GCC GCT ATA TGC AGA GGT GT             | 145                | 103.2                        |
| <i>Il-1b</i>  | GCC ACC TTT TGA CAG TGA TGA G            | AGC TTC TCC ACA GCC ACA AT             | 186                | 95.4                         |
| <i>Birc3</i>  | CCC GGA GAT CAG AGG TCA TTG              | GAA AGG CGC TGT CTT GAA CC             | 172                | 138.7                        |
| <i>Xiap</i>   | TCG GGT CAG CCT CCT TAA AC               | TGG TGT CTG CAA GTA CAA AAG T          | 119                | 100.9                        |

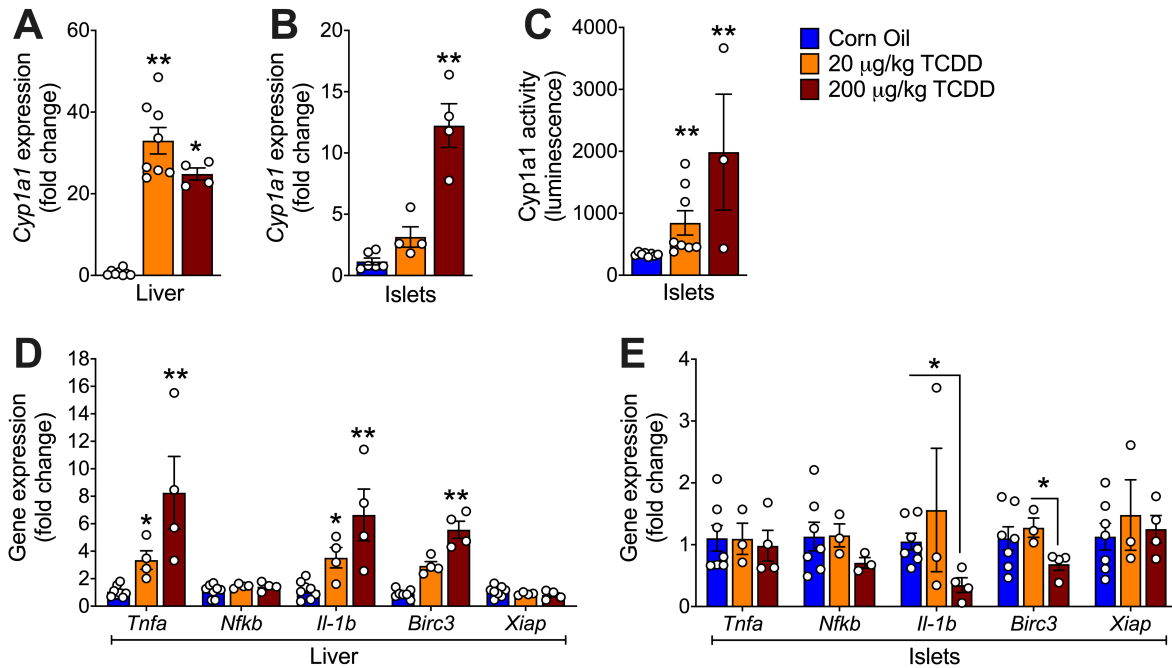

**Figure S1: Islets and liver from TCDD-exposed mice have similar induction of Cyp1a1 but different stress responses.** Male mice received a single injection of either corn oil, 20 µg/kg TCDD or 200 µg/kg TCDD. Tissues were collected either 2 or 4 weeks later. **(A-B)** *Cyp1a1* gene expression in liver **(A)** and islets **(B)**, expressed as fold change relative to control at 2-4 weeks. **(C)** *Cyp1a1* enzyme activity in isolated islets at 2-4 weeks. **(D-E)** Expression of various genes related to inflammation and apoptosis at 2 weeks in liver **(D)** and isolated islets **(E)**. \* $p < 0.05$ , \*\* $p < 0.01$  versus control unless indicated otherwise; all data was analyzed by a Kruskal-Wallis test with uncorrected Dunn's test for multiple comparison. All data are presented as mean  $\pm$  SEM and individual data points represent biological replicates (different mice).

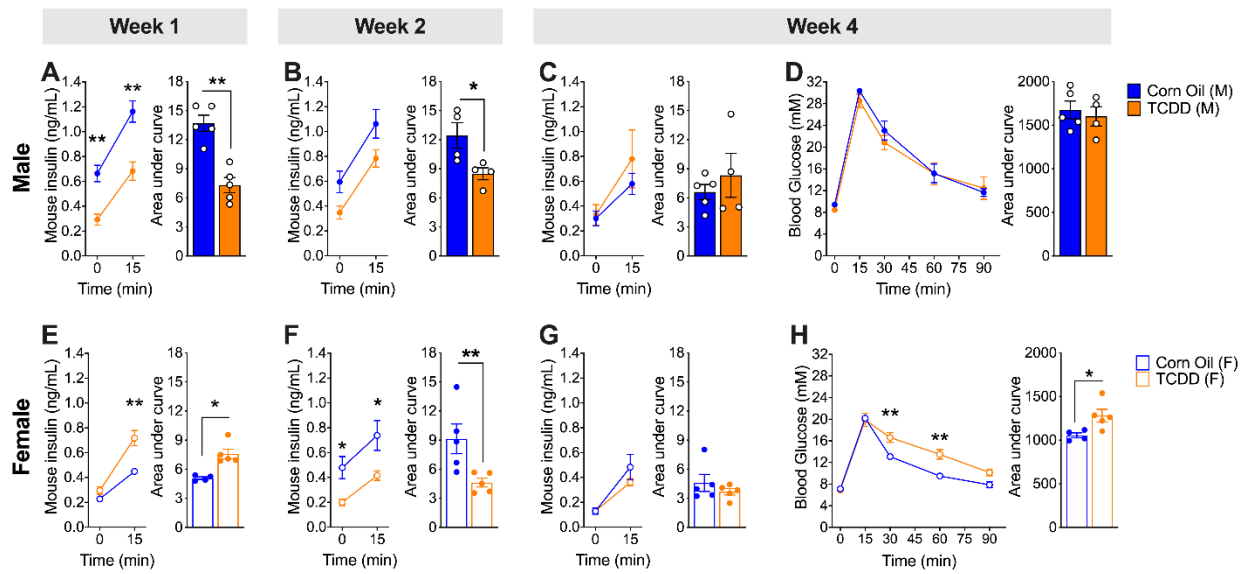

**Figure S2: Transient TCDD exposure leads to suppression of plasma insulin in both sexes, but sex differences in overall glucose tolerance *in vivo*.** A new cohort of (A-D) male (M) and (E-H) female (F) mice were injected with either corn oil or 20  $\mu\text{g}/\text{kg}$  TCDD on day 0 and glucose tolerance and glucose-stimulated insulin secretion was assessed *in vivo* on days 7, 14, and 28 (see Figure 3 for other cohort). (A-C,E-G) Plasma insulin levels before (time 0) and 15 minutes after a glucose injection on days 7 (A,E), 14 (B,F), and 28 (C,G). (D,H) Blood glucose levels were measured during a GTT on day 28. All data are presented as mean  $\pm$  SEM. Individual data points on bar graphs represent biological replicates (different mice). \* $p < 0.05$ , \*\* $p < 0.01$  versus control. The following statistical tests were used: (A-H) line graphs, two-way RM-ANOVA with Sidak test; (A-D,H) bar graphs, unpaired two-tailed t-test; (E-G) bar graphs, Mann-Whitney test.
